# Supplementary material for: Gougunao tea polysaccharides ameliorate high-fat diet-induced hyperlipidemia and modulate gut microbiota
Source: Royal Society of Chemistry journal article supplement (doi:10.1039/d2fo01828d), 2022-11-30
Supplement: d2fo01828d1.xlsx [file d2fo01828d1.xlsx]

## Sheet: Serum TC
group	number	TC	mean value	standard deviation
ND	2	2.70156	2.71071	0.258407
	3	2.30387
	4	2.89355
	5	3.0444
	6	2.56443
	8	2.75642
HFD	66	5.54027	5.63397	0.521433
	22	5.93796
	21	5.66369
	34	5.93796
	66	6.07509
	36	4.64889
SIM	20	4.52546	4.27039	0.426731
	37	4.03178
	73	4.84088
	25	3.74379
	57	4.21005
GTP40-L	27	4.18263	4.63517	0.684084
	14	4.16891
	47	4.82716
	61	5.6774
	63	3.86721
	28	5.08772
GTP40-M	29	4.62146	4.58946	0.0793333
	16	4.44318
	26	4.6626
	46	4.58032
	39	4.58032
	56	4.64889
GTP40-H	62	4.93687	4.53918	0.360225
	55	4.03178
	32	4.77231
	13	4.33347
	71	4.62146

## Sheet: Serum TG
group	number	TG	mean value	standard deviation
ND	4	1.2204	1.07834	0.129894
	6	0.981486
	9	1.15583
	10	0.955657
HFD	22	1.14937	1.30909	0.153063
	18	1.27206
	35	1.236
	36	1.332
	66	1.556
SIM	20	1.149	1.00736	0.0778759
	19	0.981
	45	0.936
	57	0.955657
	19	0.981486
	73	1.041
GTP40-L	14	0.761943	0.80499	0.0563907
	60	0.884629
	47	0.852343
	61	0.820057
	53	0.7684
	15	0.742571
GTP40-M	40	0.710286	0.784543	0.128154
	29	0.936286
	16	0.845886
	44	0.606971
	26	0.897543
	56	0.710286
GTP40-H	55	0.600514	0.69199	0.0768825
	32	0.794229
	13	0.710286
	72	0.678
	71	0.613429
	11	0.755486

## Sheet: Serum HDL-C
group	number	HDL_C	mean value	standard deviation
ND	2	1.533	1.68168	0.143658
	7	1.6584
	4	1.56
	5	1.86
	8	1.797
HFD	34	1.8188	1.43654	0.446331
	18	1.7003
	22	1.5154
	59	0.679
	51	1.4692
SIM	57	2.688	2.5986	0.398359
	25	1.992
	73	3.093
	37	2.526
	20	2.694
GTP40-L	14	2.577	2.8095	0.377699
	60	2.424
	47	2.583
	61	2.715
	28	3.21
	53	3.348
GTP40-M	29	2.751	2.6802	0.102892
	46	2.727
	26	2.778
	56	2.607
	39	2.538
GTP40-H	13	3.054	2.9505	0.287892
	55	2.523
	32	3.099
	62	2.85
	72	3.363
	71	2.814

## Sheet: Serum LDL-C
group	number	LDL_C	mean value	standard deviation
ND	2	0.45	0.3972	0.0481685
	3	0.339
	4	0.363
	5	0.441
	8	0.393
HFD	21	0.798	0.8565	0.101327
	54	0.977
	18	0.9565
	36	0.774
	66	0.777
SIM	57	0.582	0.6006	0.125506
	25	0.444
	73	0.795
	37	0.582
	20	0.6
GTP40-L	14	0.702	0.8292	0.147513
	60	0.693
	47	1.029
	28	0.789
	53	0.933
GTP40-M	26	0.837	0.79	0.0850382
	56	0.904
	40	0.69
	39	0.79
	39	0.729
GTP40-H	13	0.666	0.6264	0.109642
	55	0.474
	32	0.759
	62	0.564
	71	0.669

## Sheet: AI
group	TC	HDL	AI	AI	AI
ND	2.532	1.533	0.651663	mean value	standard deviation
	3.53809	1.6584	1.13344	0.693242	0.24984
	2.469	1.56	0.582692
	2.91	1.86	0.564516
	2.75642	1.797	0.5339
HFD	4.64889	1.81878	1.55605	mean value	standard deviation
	3.75751	1.70032	1.20988	1.51774	0.507424
	5.121	1.51541	2.37929
	3.57923	1.67897	1.1318
	6.07509	2.628	1.31168
SIM	4.2101	2.688	0.566257	mean value	standard deviation
	3.7438	1.992	0.879418	0.657351	0.132641
	4.8409	3.093	0.565115
	4.0318	2.526	0.59612
	4.5255	2.694	0.679844
GTP40-L	4.1689	2.577	0.617734	mean value	standard deviation
	4.1826	2.424	0.725495	0.76318	0.0975018
	4.8272	2.583	0.868835
	5.0877	2.715	0.873923
	5.6774	3.21	0.76866
	5.7734	3.348	0.724432
GTP40-M	4.6626	2.751	0.694875	mean value	standard deviation
	4.6489	2.727	0.704767	0.738056	0.0360064
	4.9094	2.778	0.767243
	4.6215	2.607	0.772727
	4.4432	2.538	0.75067
GTP40-H	4.77231	3.054	0.562642	mean value	standard deviation
	4.03178	2.523	0.598009	0.583048	0.0319359
	4.93687	3.099	0.593053
	4.62146	2.85	0.621565
	4.33347	2.814	0.53997

## Sheet: Serum GLU
group	number	GLU	mean value	standard deviation
ND	2	8.16	7.226	0.911087
	3	6.44
	4	8.2
	5	7.02
	6	6.31
HFD	21	10.53	11.2557	0.660204
	54	11.42
	35	11.253
	18	12.2557
	36	10.82
SIM	57	7.6	8.6325	0.924375
	73	9.33
	37	8.36
	45	9.8325
	20	8.04
GTP40-L	14	9.93	10.3075	0.590397
	60	10.01
	47	9.91
	61	11.3075
	28	10.38
GTP40-M	29	8.32	9.5425	1.0893
	46	10.27
	56	9.74
	44	8.5425
	39	10.84
GTP40-H	55	9.29	9.2655	0.768811
	62	10.42
	71	9.09
	11	8.2655
	32	9.262

## Sheet: Serum INS
group	number	INS	mean value	standard deviation
ND	2	11.4798	10.7994	0.66766
	3	10.2216
	4	11.5164
	5	10.6507
	8	10.1286
HFD	21	12.0202	12.8337	0.811906
	35	13.8255
	54	12.4145
	36	12.327
	66	13.5813
SIM	57	11.2166	11.574	0.871455
	25	10.551
	73	12.9307
	37	11.4798
	20	11.6918
GTP40-L	14	12.0487	11.9972	0.633816
	60	12.84
	47	11.8974
	61	12.1962
	28	12.114
	53	10.8871
GTP40-M	29	12.7599	11.4711	0.979903
	46	11.0322
	26	10.426
	56	10.9068
	39	12.2304
GTP40-H	13	8.83963	8.75116	0.555581
	55	8.40799
	32	9.22279
	62	8.97459
	72	7.80694
	71	9.255

## Sheet: Liver TC
group	number	Liver TC	mean value	standard deviation
ND	8	0.2325	0.2293	0.0231353
	5	0.2296
	4	0.2296
	6	0.2693
	10	0.2147
	7	0.2001
HFD	66	1.2003	1.53958	0.649555
	21	1.0819
	35	2.8107
	36	1.5773
	54	1.4194
	18	1.1479
SIM	73	0.3253	0.323367	0.182813
	19	0.242
	37	0.2678
	67	0.2567
	25	0.1667
	20	0.6817
GTP40-L	63	0.7562	0.46995	0.258073
	47	0.2103
	60	0.1697
	14	0.4367
	15	0.7739
	24	0.4729
GTP40-M	46	0.2051	0.283562	0.050846
	29	0.3497
	56	0.3526
	39	0.2803
	40	0.2811
	44	0.2656
	16	0.298
	26	0.2361
GTP40-H	11	0.4714	0.42668	0.139678
	32	0.2442
	55	0.3962
	72	0.3932
	13	0.6284

## Sheet: Liver TG
group	number	Liver TG	mean value	standard deviation
ND	7	0.7236	0.787725	0.183735
	2	0.6112
	8	0.6949
	3	0.7124
	5	0.604
	4	1.0981
	6	1.0206
	10	0.837
HFD	22	6.0859	5.18202	1.07708
	36	5.7993
	54	5.8921
	21	4.5402
	35	3.5926
SIM	37	1.1977	1.69132	0.293752
	67	1.4974
	25	1.7914
	20	1.9468
	73	1.9568
	19	1.7578
GTP40-L	27	1.5261	1.54227	0.388933
	47	1.1659
	60	0.9308
	14	1.6464
	15	2.1054
	53	1.7704
	63	1.6509
GTP40-M	17	1.4782	1.4142	0.12047
	29	1.4751
	56	1.3189
	40	1.3404
	44	1.2137
	16	1.632
	26	1.4017
	46	1.3829
	39	1.4849
GTP40-H	72	1.087	1.20687	0.222091
	62	1.6241
	11	1.0473
	32	1.2232
	55	1.2312
	13	1.0284

## Sheet: Serum ALT
group	number	AST (U/L)	mean value	standard deviation	ALT (U/L)	mean value	standard deviation
ND	2	70.858	70.157	4.40418	24.228	19.981	2.87937
	3	70.816			20.31
	4	64.458			18.931
	5	68.157			20.18
	8	76.496			16.256
HFD	21	87.754	79.0376	5.98735	19.803	20.8626	1.49938
	35	73.592			22.405
	54	73.278			18.827
	36	81.146			21.373
	66	79.418			21.905
SIM	57	93.446	81.4876	9.07132	15.154	15.3736	1.00674
	25	85.75			14.07
	73	70.452			15.846
	37	82.942			15.024
	20	74.848			16.774
GTP40-L	14	59.96	77.2067	16.0718	17.555	18.3952	3.58921
	60	88.182			22.578
	47	86.254			23.239
	61	96.352			16.118
	28	75.862			15.215
	53	56.63			15.666
GTP40-M	29	50.192	72.1004	13.1026	15.604	16.3496	1.94202
	46	80.344			16.932
	26	70.878			19.476
	56	75.906			14.754
	39	83.182			14.982
GTP40-H	13	98.396	69.4783	15.3007	13.81	14.46	0.620415
	55	57.528			14.614
	32	68.056			15.212
	62	55.932			14.346
	71	69.892			15.056
	72	67.066			13.722
