# Supplementary material for: Gougunao tea polysaccharides ameliorate high-fat diet-induced hyperlipidemia and modulate gut microbiota
Source: Royal Society of Chemistry journal article supplement (doi:10.1039/d2fo01828d), 2022-11-30
Supplement: d2fo01828d2.xlsx [file d2fo01828d2.xlsx]

## Sheet: Sheet1
group	number	SOD	mean value	standard deviation	GSH-Px	mean value	standard deviation	CAT	mean value	standard deviation	MDA	mean value	standard deviation
ND	2	52.318	59.4598	6.4789	389.668	402.196	17.3735	52.318	59.4598	6.4789	3.093	2.8578	0.327847
	3	61.003			386.393			61.003			3.171
	4	55.821			398.536			55.821			2.912
	5	69.492			429.929			69.492			2.342
	8	58.665			406.456			58.665			2.771
HFD	21	40.566	38.928	2.26918	346.456	348.538	9.89655	38.786	43.9428	5.67003	4.265	3.7834	0.627729
	35	37.741			359.105			42.652			3.755
	54	36.363			335.307			50.581			3.191
	36	38.024			357.598			49.151			4.554
	66	41.946			344.222			38.544			3.152
SIM	57	40.942	44.8458	2.3645	367.296	364.845	5.75703	52.538	48.7348	2.87627	3.819	3.554	0.339479
	25	46.262			362.157			50.688			3.916
	73	44.983			356.081			48.062			3.061
	37	44.94			370.355			47.041			3.425
	20	47.102			368.334			45.345			3.549
GTP40-L	14	43.498	41.5305	3.78654	371.462	351.388	12.0516	44.855	44.2468	1.74284	3.632	3.656	0.231615
	60	47.72			355.307			42.277			3.271
	47	37.991			354.634			45.051			3.925
	61	42.512			336.535			42.74			3.867
	28	38.317			345.194			46.995			3.624
	53	39.145			345.194			43.563			3.617
GTP40-M	29	38.273	42.1826	4.25786	397.117	354.849	33.5553	45.558	45.5456	3.36516	3.145	3.4412	0.367716
	46	40.881			384.599			41.719			3.225
	26	38.477			322.557			42.746			3.716
	56	45.628			335.336			49.54			3.949
	39	47.654			334.634			48.165			3.171
GTP40-H	13	81.852	72.8392	7.18166	404.174	439.427	35.9845	63.421	71.9302	4.86572	2.566	2.21817	0.279476
	55	78.316			487.67			72.648			1.915
	32	74.513			475.549			74.127			2.187
	62	72.492			444.643			75.482			1.947
	72	67.985			405.317			76.552			2.16
	71	61.877			419.209			69.351			2.534
