# Supplementary material for: Gougunao tea polysaccharides ameliorate high-fat diet-induced hyperlipidemia and modulate gut microbiota
Source: Royal Society of Chemistry journal article supplement (doi:10.1039/d2fo01828d), 2022-11-30
Supplement: d2fo01828d3.xlsx [file d2fo01828d3.xlsx]

## Sheet: TNF-a IL-6 IL-10
group	number	TNF-a	mean value	standard deviation	IL-6	mean value	standard deviation	IL-10	mean value	standard deviation
ND	2	42.4977	42.8392	1.95461	115.151	123.782	5.39716	15.119	14.7244	0.291279
	3	40.6206			125.979			14.374
	4	41.9521			123.121			14.714
	5	45.8884			124.921			14.534
	8	43.2372			129.737			14.881
HFD	21	52.6731	63.3631	6.90789	148.845	154.69	12.7992	11.838	10.7412	1.68683
	35	63.518			174.462			10.956
	54	68.2277			140.586			9.002
	36	61.9069			150.827			12.828
	66	70.4899			158.732			9.082
SIM	57	50.4033	52.2981	1.87921	148.843	141.922	8.04384	10.43	12.3006	1.76896
	25	51.5239			146.382			11.662
	73	52.1524			147.783			14.14
	37	51.9801			135.307			11.054
	20	55.4308			131.296			14.217
GTP40-L	14	59.286	61.1684	3.59415	146.528	148.296	19.1995	13.508	11.0863	2.01335
	60	65.0115			120.092			9.273
	47	65.9158			179.146			9.063
	61	59.5541			154.748			10.55
	28	60.6412			148.118			13.616
	53	56.6016			141.145			10.508
GTP40-M	29	52.6016	60.3962	5.62669	139.714	137.49	19.0295	9.473	11.3744	1.34639
	46	67.4574			136.732			12.945
	26	63.4782			121.413			11.864
	56	57.8498			168.01			10.618
	39	60.594			121.583			11.972
GTP40-H	13	31.4284	31.4532	2.99323	97.276	104.957	14.6353	17.23	16.9113	1.07625
	55	33.2936			98.502			17.999
	32	29.2241			101.442			16.28
	62	26.6748			98.707			18.261
	72	34.3036			99.116			15.971
	71	33.7948			134.702			15.727

## Sheet: LPS LEP ADP
group	number	LPS	mean value	standard deviation	LEP	mean value	standard deviation	ADP	mean value	standard deviation
ND	2	36.642	34.9386	1.30388	4.59629	5.05887	0.427043	13.2323	13.5912	0.268857
	3	35.94			4.61413			13.4138
	4	34.417			5.39638			13.7996
	5	33.5			5.48771			13.6292
	8	34.194			5.19986			13.881
HFD	21	46.961	41.9626	3.74688	5.28348	5.61475	0.403621	10.492	11.3332	1.41633
	35	44.324			6.02663			12.9353
	54	37.28			6.07921			10.844
	36	40.831			5.27899			12.6929
	66	40.417			5.40547			9.70176
SIM	57	40.872	39.3826	2.73	5.0485	5.11151	0.301043	13.0454	12.1338	1.96487
	25	43.284			5.18968			14.64
	73	38.335			5.35105			11.8385
	37	38.171			4.6218			9.27478
	20	36.251			5.34653			11.8704
GTP40-L	14	40.737	41.5952	1.24682	5.34653	5.47246	0.184455	11.4062	11.6262	0.606376
	47	40.267			5.57533			11.604
	61	42.919			5.41002			11.1479
	28	41.134			5.31495			11.5349
	53	42.919			5.38729			11.2502
GTP40-M	29	39.737	40.6735	0.60702	5.80066			12.8141
	46	40.519			4.78166	5.22264	0.656223	11.6348	12.0894	0.907117
	26	40.704			6.06631			12.9178
	40	41.2735			5.7959			10.7174
	56	41.134			4.81018			12.6841
GTP40-H	13	36.017	30.0878	3.72197	4.65915			12.4926
	55	26.702			4.25143	4.36393	0.200266	16.5854	16.3242	1.03703
	32	29.133			4.25143			16.5854
	62	26.344			4.44445			15.2062
	72	29.523			4.10956			17.8514
	71	32.808			4.45273			16.6412
					4.674			15.076
