# Supplementary material for: Gougunao tea polysaccharides ameliorate high-fat diet-induced hyperlipidemia and modulate gut microbiota
Source: Royal Society of Chemistry journal article supplement (doi:10.1039/d2fo01828d), 2022-11-30
Supplement: d2fo01828d4.xlsx [file d2fo01828d4.xlsx]

## Sheet: Sheet1
group	number	TNF-a	mean value	standard deviation	IL-10	mean value	standard deviation	IL-6	mean value	standard deviation	TLR4	mean value	standard deviation
ND	5	1.1401	1.01625	0.126928	1.1062	1.00435	0.0775403	0.9482	1.00083	0.0408489	0.6624	1.048	0.374381
	4	0.9068			1.0085			1.0281			1.5538
	7	1.1113			0.9195			1.0377			0.9218
	10	0.9068			0.9832			0.9893			1.054
HFD	22	1.3755	1.50968	0.206773	0.6237	0.492675	0.174763	1.4077	1.35593	0.268536	3.0649	2.12728	0.675329
2	36	1.4845			0.37			1.2454			1.8823
2	54	1.8095			0.6608			1.0693			2.0885
2	59	1.3692			0.3162			1.7013			1.4734
SIM	37	0.8217	0.8145	0.117184	1.1478	0.955	0.231666	0.893	0.808025	0.157473	0.4986	0.6944	0.246403
3	19	0.9772			1.0489			0.7104			0.7282
3	25	0.7405			0.6194			0.984			1.0299
3	57	0.7186			1.0039			0.6447			0.5209
GTP40-L	14	0.9461	1.0548	0.148762	0.4597	0.539725	0.158827	0.9309	1.08317	0.243237	0.7733	0.636375	0.227201
4	60	1.0693			0.4804			1.4439			0.4917
4	61	1.2599			0.7768			0.9439			0.8802
4	63	0.9439			0.442			1.014			0.4003
GTP40-M	29	0.9931	0.918325	0.0977687	0.5873	0.85835	0.245165	0.7087	0.85985	0.138693	0.8721	0.828925	0.194896
5	40	0.8586			0.7197			0.8665			0.5847
5	44	1.0093			1.1062			1.0425			0.8025
5	56	0.8123			1.0202			0.8217			1.0564
GTP40-H	11	0.7137	0.892675	0.19531	1.0489	0.973925	0.210099	0.9671	0.831175	0.148089	0.6012	0.776775	0.229558
6	32	0.9013			1.0441			0.7047			1.0638
6	55	0.7937			0.6654			0.9515			0.582
6	72	1.162			1.1373			0.7014			0.8601
