# Supplementary material for: Gougunao tea polysaccharides ameliorate high-fat diet-induced hyperlipidemia and modulate gut microbiota
Source: Royal Society of Chemistry journal article supplement (doi:10.1039/d2fo01828d), 2022-11-30
Supplement: d2fo01828d5.xlsx [file d2fo01828d5.xlsx]

## Sheet: sobs ace chao1
group	number	sobs	mean value	standard deviation	ace	mean value	standard deviation	chao1	mean value	standard deviation
ND	2	315	373.2	47.6466	385.058	430.4	43.2361	375.375	442.571	47.5193
	3	389			451.703			462.029
	4	409			444.138			450.25
	5	331			386.939			422.12
	10	422			484.16			503.079
HFD	21	265	218.8	34.4413	320.157	293.483	30.0239	328.577	279.851	28.0777
	35	218			329.744			279.031
	36	173			282.884			266.882
	54	203			260.334			262.4
	66	235			274.294			262.364
SIM	19	202	243.2	37.4059	232.678	286.504	46.9733	237.062	290.887	46.173
	20	208			242.032			249
	37	262			306.029			318
	45	254			310.605			305.333
	57	290			341.175			345.038
GTP40-L	24	238	216.8	25.034	267.027	252.751	31.4071	265.038	249.762	29.6867
	27	235			265.356			265.565
	47	176			203.132			200
	60	212			243.356			245.115
	63	223			284.886			273.091
GTP40-M	16	241	247.4	26.5951	265.643	281.946	28.4861	267.714	287.351	30.6164
	29	227			260.357			270.588
	39	239			298.263			309
	46	236			260.991			259.333
	56	294			324.474			330.12
GTP40-H	11	229	259.4	19.2821	324.038	315.843	17.8344	297.143	320.59	18.127
	13	262			311.004			319.037
	32	282			339.043			347.1
	55	266			314.626			325.231
	62	258			290.506			314.438

## Sheet: heatmap.taxa.table
OTU ID	GTP40_H	GTP40_M	GTP40_L	ND	HFD	SIM
p__Firmicutes	25750	27724	25955	19767	27666	22938
p__Actinobacteriota	1606	866	1907	919	2570	3593
p__Bacteroidota	1616	759	366	6662	85	1595
p__Desulfobacterota	1295	1264	1679	1719	434	1955
p__Patescibacteria	333	272	986	1132	129	315
p__Proteobacteria	43	10	7	589	43	196
p__Campilobacterota	42	67	59	132	33	347
p__Verrucomicrobiota	275	0.1	0.1	0.1	0.1	0.1
p__Deferribacterota	6	9	11	1	10	28
p__Cyanobacteria	4	0.1	0.1	50	0.1	0.1
p__unclassified_k__norank_d__Bacteria	0.1	0.1	0.1	0.1	1	2
p__Halanaerobiaeota	0.1	0.1	0.1	0.1	0.1	1
p__Chloroflexi	0.1	0.1	0.1	0.1	0.1	0.1

## Sheet: heatmap.taxa.relative 
	ND					HFD					SIM					GTP40-L					GTP40-M					GTP40-H				ND
OTU ID	10	2	3	4	5	21	35	36	54	66	19	20	37	45	57	24	27	47	60	63	16	29	39	46	56	11	13	32	55	62
p__Firmicutes	0.494979	0.788189	0.58374	0.552711	0.771657	0.90504	0.846857	0.869588	0.945142	0.899745	0.637661	0.82432	0.806206	0.617513	0.817442	0.76323	0.921507	0.926189	0.904394	0.674954	0.791095	0.904201	0.907817	0.954796	0.917891	0.873139	0.648736	0.915243	0.813761	0.906299
p__Bacteroidota	0.410707	0.0194053	0.130994	0.311711	0.202673	0.00503697	0.00100094	0.00216331	0.00180814	0.00374544	0.00629621	0.0897291	0.0510155	0.0729715	0.037519	0.00713571	0.00887927	0.0077169	0.00238933	0.0330309	0.0804624	0.0143683	0.0123018	0.0120435	0.00339027	0.00920216	0.210132	0.00594104	0.0247328	0.0109134
p__Actinobacteriota	0.00603791	0.0623486	0.0583772	0.0174034	0.00422976	0.0620258	0.129896	0.113558	0.0205353	0.0889542	0.275516	0.0440735	0.116948	0.034387	0.109102	0.112428	0.034839	0.0444287	0.0769107	0.0392625	0.0552775	0.0165639	0.0358723	0.00671596	0.0254432	0.0560201	0.0739724	0.0167253	0.076394	0.0361629
p__Desulfobacterota	0.0598302	0.0457202	0.133803	0.0282199	0.00988021	0.0247005	0.00894385	0.011204	0.019599	0.00558587	0.0732298	0.0316102	0.0213103	0.1555	0.0340318	0.103742	0.0309645	0.01792	0.01143	0.107036	0.0644151	0.0416842	0.027219	0.0209551	0.0497885	0.0302864	0.0633173	0.0545995	0.0381324	0.0227955
p__Patescibacteria	0.0198896	0.0467211	0.0818831	0.0285105	0.0057796	0.00074263	0.0104937	0.00190501	0.00732944	0.000387459	3.22883e-05	0.00923445	0.00019373	0.0412967	0.000129153	0.0129153	0.00184043	0.0013884	0.00264764	0.140357	6.45765e-05	0.0217623	0.0158858	0.00371315	0.00242162	0.0191469	0.00019373	0.00448807	0.00858868	0.0214071
p__Proteobacteria	0.00326112	0.0318685	0.00865326	0.0505957	0.000678054	0.0010978	0.00251849	3.22883e-05	0.00300281	0.000290594	0.00184043	3.22883e-06	0.000419748	0.0285751	0.000871783	0.000226018	0.000226018	6.45765e-05	0.000484324	0.000161441	0.000258306	3.22883e-06	0.00019373	0.000129153	0.000968648	0.00122695	0.00167899	0.00177585	0.000839495	0.00135611
p__Campilobacterota	0.00500468	0.000161441	0.00161441	0.00952504	0.00500468	0.000645765	0.000226018	0.000904072	0.0024862	0.00100094	0.00513383	0.000871783	0.00355171	0.0457202	0.00074263	0.000290594	0.000807207	0.00200187	0.00167899	0.00471409	0.00787834	0.0010978	0.00019373	0.00151755	9.68648e-05	0.00258306	0.00167899	0.000548901	0.00132382	0.000678054
p__Verrucomicrobiota	3.22883e-06	3.22883e-06	3.22883e-06	3.22883e-06	3.22883e-06	3.22883e-06	3.22883e-06	3.22883e-06	3.22883e-06	3.22883e-06	3.22883e-06	3.22883e-06	3.22883e-06	3.22883e-06	3.22883e-06	3.22883e-06	3.22883e-06	3.22883e-06	3.22883e-06	3.22883e-06	3.22883e-06	3.22883e-06	3.22883e-06	3.22883e-06	3.22883e-06	0.00765232	3.22883e-06	0.000613477	0.0360983	6.45765e-05
p__Deferribacterota	0.000161441	3.22883e-06	3.22883e-06	3.22883e-06	3.22883e-06	0.000613477	6.45765e-05	0.000581189	6.45765e-05	0.000290594	0.000226018	0.000161441	0.000290594	0.00368086	9.68648e-05	3.22883e-06	0.00093636	0.000290594	6.45765e-05	0.000484324	0.000548901	0.000290594	0.000484324	0.000129153	3.22883e-06	0.00074263	3.22883e-06	3.22883e-05	9.68648e-05	3.22883e-05
p__Cyanobacteria	0.000129153	0.00558587	0.00093636	0.00132382	9.68648e-05	3.22883e-06	3.22883e-06	3.22883e-06	3.22883e-06	3.22883e-06	6.45765e-05	3.22883e-06	3.22883e-06	3.22883e-06	3.22883e-06	3.22883e-06	3.22883e-06	3.22883e-06	3.22883e-06	3.22883e-06	3.22883e-06	3.22883e-05	3.22883e-06	3.22883e-06	3.22883e-06	3.22883e-06	0.000290594	3.22883e-06	3.22883e-06	0.000290594
p__unclassified_k__norank_d__Bacteria	3.22883e-06	3.22883e-06	3.22883e-06	3.22883e-06	3.22883e-06	9.68648e-05	3.22883e-06	6.45765e-05	3.22883e-05	3.22883e-06	3.22883e-06	3.22883e-06	6.45765e-05	0.000161441	6.45765e-05	3.22883e-05	3.22883e-06	3.22883e-06	3.22883e-06	3.22883e-06	3.22883e-06	3.22883e-06	3.22883e-05	3.22883e-06	3.22883e-06	3.22883e-06	3.22883e-06	3.22883e-05	3.22883e-05	3.22883e-06
p__Halanaerobiaeota	3.22883e-06	3.22883e-06	3.22883e-06	3.22883e-06	3.22883e-06	3.22883e-06	3.22883e-06	3.22883e-06	3.22883e-06	3.22883e-06	3.22883e-06	3.22883e-06	3.22883e-06	0.000161441	3.22883e-06	3.22883e-06	3.22883e-06	3.22883e-06	3.22883e-06	3.22883e-06	3.22883e-06	3.22883e-06	3.22883e-06	3.22883e-06	3.22883e-06	3.22883e-06	3.22883e-06	3.22883e-06	3.22883e-06	3.22883e-06
p__Chloroflexi	3.22883e-06	3.22883e-06	3.22883e-06	3.22883e-06	3.22883e-06	3.22883e-06	3.22883e-06	3.22883e-06	3.22883e-06	3.22883e-06	3.22883e-06	3.22883e-06	3.22883e-06	3.22883e-05	3.22883e-06	3.22883e-06	3.22883e-06	3.22883e-06	3.22883e-06	3.22883e-06	3.22883e-06	3.22883e-06	3.22883e-06	3.22883e-06	3.22883e-06	3.22883e-06	3.22883e-06	3.22883e-06	3.22883e-06	3.22883e-06

## Sheet: bacterial on phylum
	ND group					HFD group					SIM group					GTP40-L group					GTP40-M group					GTP40-H group
	A10	A4	A2	A3	A5	B66	B54	B21	B36	B35	C20	C57	C37	C45	C19	D27	D63	D60	D47	D24	E46	E29	E56	E16	E39	F13	F11	F55	F32	F62
Lactobacillus	938	2899	702	2890	9847	5800	2430	391	5029	1147	204	442	1168	606	9858	1991	375	7014	2224	1926	462	11480	11490	2812	6473	756	591	7302	7283	18312
unclassified_f__Lachnospiraceae	2323	4723	521	1063	5220	473	6558	7013	1710	299	2227	2798	4539	4805	2419	3934	1847	1908	1337	990	10707	2730	1839	2831	3323	4213	12622	1452	4782	1365
Faecalibaculum	91	2	9	13	0	9648	651	37	7490	9596	1576	6551	2041	7	3413	1804	4286	4285	7243	14170	38	683	1541	1081	5895	2207	136	6933	4561	544
Lachnospiraceae_NK4A136_group	2307	2529	1156	2422	4627	2223	9179	1330	2649	343	3894	1920	737	272	316	3027	4901	963	2127	1077	7216	2955	3474	6624	2584	784	1897	1279	2656	3016
Dubosiella	1442	14	106	141	0	4688	68	92	5427	3979	3391	5598	504	1	0	3986	536	6627	7899	43	6	726	2175	2383	2959	2859	2	3841	2724	503
norank_f__Muribaculaceae	12275	7113	258	3262	4207	81	13	65	26	21	2254	615	697	1458	117	127	727	26	121	165	230	292	74	1657	289	5219	60	702	123	260
norank_f__Lachnospiraceae	1415	1691	243	1204	1487	156	681	8484	738	97	1068	749	1720	2758	447	1325	1078	149	353	975	3170	1785	356	514	1143	4690	800	1462	991	779
Desulfovibrio	1841	852	1396	4138	299	142	523	724	310	267	707	1027	618	2065	2202	897	3163	337	539	3209	639	1274	1539	1930	827	1922	701	1014	1668	659
Enterorhabdus	134	129	1332	1314	106	977	458	1108	1612	598	561	1411	3370	628	329	556	743	1416	468	1630	160	452	267	1114	442	1325	1342	1948	307	943
Lachnospiraceae_UCG-006	128	74	3	24	49	973	2512	372	679	20	982	652	623	472	420	3310	668	663	1062	318	1648	402	152	670	457	1272	4153	437	1391	317
Staphylococcus	150	1138	1786	752	21	2040	112	687	361	7580	33	2379	493	59	31	1991	151	775	2937	29	274	2	7	96	37	64	206	114	244	8
Turicibacter	426	326	16334	5095	135	0	0	0	0	0	0	0	0	0	0	0	0	0	0	0	0	0	1	0	0	0	0	0	1	0
Romboutsia	9	1	368	63	0	341	406	16	551	48	751	580	1675	18	7	2648	2326	554	783	1109	90	977	1080	2607	588	311	251	91	189	227
Blautia	32	42	7	43	78	23	264	3101	304	213	7980	107	308	835	51	225	521	54	94	723	110	308	68	96	573	823	687	124	67	177
Coriobacteriaceae_UCG-002	1	0	0	0	0	1108	6	17	1215	2172	508	777	37	0	8129	20	275	206	339	1684	0	36	21	13	424	218	8	11	4	6
Monoglobus	872	6	839	169	64	93	44	40	121	43	24	575	435	573	9	1454	229	515	1620	279	720	112	3916	303	78	549	68	24	1696	883
Clostridium_sensu_stricto_1	1	1	3	2	0	303	474	2	515	0	1219	136	6824	2	9	148	727	75	39	0	64	2645	195	2	1970	5	2	112	163	242
Candidatus_Saccharimonas	610	850	1390	2501	177	7	189	1	55	319	286	4	5	1278	0	57	4346	82	43	400	115	673	75	2	492	3	592	262	139	658
Lachnoclostridium	566	256	227	421	221	21	1105	1920	47	31	165	179	358	141	91	67	335	3550	113	13	1232	241	303	1469	126	231	192	1151	336	479
norank_f__norank_o__Clostridia_UCG-014	1430	503	824	1212	250	31	7	194	12	6	39	43	154	1095	326	17	1328	13	20	486	85	209	436	18	56	21	138	25	143	116
Anaerotruncus	105	47	11	20	144	57	2046	963	868	0	416	698	729	1444	24	36	265	74	10	21	225	57	46	106	46	2	0	59	5	8
Aerococcus	29	156	181	33	3	243	77	1342	20	2490	0	196	156	1006	168	28	0	38	16	0	3	0	23	8	11	255	61	53	125	7
Bifidobacterium	1	6	0	25	0	539	18	12	589	283	161	677	35	1	1	46	167	198	333	53	0	1	407	406	194	4	1	174	89	17
Family_XIII_AD3011_group	74	9	14	36	5	43	48	65	20	34	90	218	184	1513	258	390	100	21	64	14	19	37	59	113	93	95	613	12	20	22
norank_f__Desulfovibrionaceae	12	22	0	6	7	31	84	41	37	10	271	26	27	2736	66	61	152	16	16	4	10	17	1	62	16	32	237	164	15	42
Roseburia	721	718	41	254	181	8	47	72	16	6	103	13	22	27	146	9	15	4	15	8	178	878	6	109	218	20	153	13	20	15
Corynebacterium	26	291	401	94	4	92	134	699	60	654	1	68	57	372	39	232	1	164	44	0	39	1	36	32	27	193	56	49	84	30
Colidextribacter	229	163	17	37	150	100	846	122	36	5	258	85	53	264	55	204	39	14	83	11	413	124	40	243	30	38	52	54	68	82
Eubacterium_xylanophilum_group	396	312	64	912	5	23	12	108	6	15	82	6	13	30	396	201	25	2	0	124	318	100	431	0	227	0	0	44	0	0
Alloprevotella	84	1636	20	275	1534	0	0	0	1	0	13	13	66	31	2	8	0	0	1	0	0	0	1	10	0	0	0	10	1	1
norank_f__Ruminococcaceae	153	110	7	65	223	93	105	376	16	5	138	84	56	391	31	106	100	11	94	5	432	83	71	209	137	120	427	21	19	17
Alistipes	176	489	173	301	168	20	27	18	17	9	63	319	459	297	29	54	183	24	43	37	74	71	20	158	25	156	12	23	30	46
Helicobacter	155	295	5	50	155	31	77	20	28	7	27	23	110	1416	159	25	146	52	62	9	47	34	3	244	6	52	80	41	17	21
norank_f__Eubacterium_coprostanoligenes_group	24	57	4	14	1	0	0	445	2	0	0	2	104	18	2	399	1	23	0	1	0	293	0	18	50	0	1351	0	0	95
Acinetobacter	7	888	659	188	2	1	1	1	0	4	0	6	3	820	55	2	0	10	1	1	3	0	28	1	3	42	14	10	8	19
Adlercreutzia	0	0	2	5	0	22	0	0	19	23	87	430	47	1	26	189	14	330	160	86	7	17	23	120	16	526	283	165	17	101
Intestinimonas	127	82	7	25	37	113	4	11	12	3	42	42	55	441	114	135	123	25	28	146	75	123	35	251	101	94	160	77	138	54
Bacteroides	51	41	3	14	57	8	0	44	5	0	442	202	279	49	27	42	64	12	40	17	56	37	6	180	40	629	174	6	2	16
GCA-900066575	93	163	3	15	61	7	617	70	21	3	83	12	62	33	5	58	38	12	52	10	335	37	71	260	127	66	42	3	46	117
norank_f__Erysipelotrichaceae	32	106	350	125	194	40	106	5	0	5	0	469	2	0	0	0	0	0	4	508	0	0	4	243	1	6	141	1	0	51
NK4A214_group	64	143	5	116	53	0	5	61	8	6	160	0	82	152	0	98	116	4	9	78	100	107	119	210	67	21	172	71	92	135
Butyricicoccus	27	15	4	8	92	8	19	28	8	1	157	6	10	178	23	98	14	22	79	14	530	135	63	132	189	54	67	10	58	95
norank_f__Oscillospiraceae	126	81	25	54	62	79	14	8	12	7	65	26	46	133	74	155	221	28	41	95	51	70	41	199	96	33	23	61	72	49
unclassified_f__Christensenellaceae	4	2	0	5	0	19	368	92	47	9	67	33	56	237	164	91	36	29	36	18	91	69	23	53	95	10	114	25	43	33
Streptococcus	5	7	23	18	8	31	73	79	43	23	20	250	265	112	106	67	53	49	46	45	25	3	11	33	11	57	101	33	13	10
unclassified_f__Oscillospiraceae	187	187	34	53	129	4	4	12	3	2	17	12	18	173	7	26	21	1	11	7	127	100	15	151	23	35	24	31	29	15
Eubacterium_nodatum_group	111	18	2	45	3	24	1	44	2	19	39	43	26	12	2	80	67	45	43	18	61	34	53	106	34	22	376	5	51	36
Eubacterium_brachy_group	19	11	17	48	7	29	73	81	64	6	12	65	39	148	47	71	67	125	24	43	54	29	10	62	26	55	70	53	22	21
Akkermansia	0	0	0	0	0	0	0	0	0	0	0	0	0	0	0	0	0	0	0	0	0	0	0	0	0	0	237	1118	19	2
SUM					0					0					0					0					0					1376
unclassified_f__Ruminococcaceae	36	35	8	40	71	4	67	35	4	2	6	38	19	437	15	5	18	5	7	2	222	82	9	56	34	22	0	8	7	8
SUM					190					112					515					37					403					45

## Sheet: Heatmap of Spearman’s 
name	Serum TC	Serum TG	Body weight	AI	Serum GSH-Px	Serum CAT	Serum SOD	Serum MDA	Serum IL-6	Serum IL-10	Serum TNF-伪	Serum LPS	Liver weight	Liver TG	Liver TC	INS	GLU
g__Lactobacillus	-0.248485	-0.236364	0.0181818	-0.393939	0.10303	0.345455	-0.00606061	-0.418182	-0.284848	-0.0666667	-0.151515	-0.515152	-0.527273	0.0666667	-0.224242	0.0666667	-0.030303
g__Faecalibaculum	-0.187879	0.50303	0.309091	0.0909091	-0.224242	-0.139394	-0.369697	-0.0424242	0.321212	-0.539394	0.430303	-0.0545455	0.127273	0.430303	0.381818	0.539394	-0.248485
g__unclassified_f__Lachnospiraceae	0.393939	-0.2	-0.284848	0.10303	0.163636	0.2	0.369697	0.175758	-0.2	0.442424	-0.393939	0.0424242	0.0181818	-0.224242	-0.248485	-0.527273	0.587879
g__Lachnospiraceae_NK4A136_group	0.6	0.115152	0.236364	-0.127273	-0.260606	-0.0424242	-0.127273	0.224242	0.0424242	-0.0545455	0.115152	0.030303	-0.0787879	0.284848	-0.0181818	0.115152	0.406061
g__Dubosiella	-0.236364	0.430303	0.369697	0.163636	-0.309091	-0.139394	-0.442424	-0.127273	0.151515	-0.6	0.454545	-0.0787879	0.0909091	0.357576	0.309091	0.478788	-0.151515
g__norank_f__Lachnospiraceae	-0.212121	-0.648485	-0.527273	-0.0545455	0.50303	0.50303	0.551515	-0.442424	-0.709091	0.563636	-0.684848	-0.418182	-0.345455	-0.527273	-0.709091	-0.769697	0.333333
g__Lachnospiraceae_UCG-006	0.29697	0.00606061	-0.393939	-0.2	0.248485	0.284848	0.490909	-0.0424242	-0.151515	0.442424	-0.248485	-0.236364	-0.163636	-0.115152	-0.248485	-0.442424	0.345455
g__Staphylococcus	0.284848	0.745455	0.393939	0.442424	-0.539394	-0.6	-0.478788	0.539394	0.757576	-0.684848	0.527273	0.624242	0.781818	0.551515	0.648485	0.684848	-0.115152
g__Enterorhabdus	-0.369697	-0.260606	-0.163636	0.0545455	-0.0424242	0.260606	0.151515	-0.345455	-0.393939	-0.030303	-0.163636	-0.333333	-0.381818	-0.163636	-0.0424242	-0.345455	0.0666667
g__Desulfovibrio	-0.393939	-0.757576	-0.672727	-0.260606	0.806061	0.757576	0.69697	-0.6	-0.818182	0.793939	-0.854545	-0.636364	-0.527273	-0.709091	-0.842424	-0.878788	0.333333
g__norank_f__Muribaculaceae	-0.6	-0.684848	-0.672727	-0.539394	0.636364	0.575758	0.660606	-0.90303	-0.818182	0.551515	-0.575758	-0.781818	-0.672727	-0.575758	-0.866667	-0.660606	-0.224242
g__Blautia	0.10303	-0.0909091	0.0181818	0.333333	-0.030303	-0.0909091	-0.00606061	0.212121	-0.10303	0.187879	-0.00606061	0.272727	0.175758	-0.272727	0.030303	-0.284848	0.248485
g__Lachnoclostridium	0.0666667	-0.6	-0.0666667	0.236364	0.248485	0.309091	0.139394	-0.0181818	-0.406061	0.309091	-0.551515	-0.127273	-0.224242	-0.139394	-0.369697	-0.418182	0.430303
g__Coriobacteriaceae_UCG-002	-0.139818	0.534957	0.407297	0.407297	-0.455929	-0.480245	-0.498483	0.19453	0.413376	-0.601826	0.626143	0.358664	0.425534	0.310032	0.571431	0.504562	-0.340427
g__Aerococcus	0.0909091	0.357576	0.030303	0.369697	0.030303	-0.430303	-0.0909091	0.309091	0.442424	-0.0787879	0.224242	0.478788	0.672727	0.115152	0.163636	0.236364	-0.309091
g__Anaerotruncus	0.626143	0.212767	0.620064	0.680854	-0.553194	-0.285716	-0.51672	0.462008	0.158055	-0.480245	0.267478	0.285716	0.231004	0.674775	0.267478	0.273557	0.510641
g__Monoglobus	-0.00606061	-0.030303	-0.272727	-0.636364	0.248485	0.248485	0.284848	-0.406061	-0.345455	0.333333	-0.030303	-0.381818	-0.29697	-0.345455	-0.478788	-0.2	0.0666667
g__Romboutsia	0.333333	0.369697	0.224242	-0.030303	-0.309091	-0.0787879	-0.139394	0.0545455	0.030303	-0.151515	0.418182	-0.0909091	-0.115152	0.272727	0.163636	0.0909091	0.187879
g__Candidatus_Saccharimonas	-0.381818	-0.369697	-0.163636	-0.515152	0.224242	0.29697	0.139394	-0.151515	-0.0666667	0.224242	-0.272727	-0.2	-0.442424	-0.321212	0.0424242	-0.0545455	-0.224242
g__Corynebacterium	0.333333	0.478788	0.309091	0.624242	-0.187879	-0.551515	-0.333333	0.527273	0.50303	-0.224242	0.393939	0.636364	0.781818	0.284848	0.309091	0.333333	-0.0666667
g__norank_f__Eubacterium_coprostanoligenes_group	0.198009	-0.143386	-0.102418	-0.12973	-0.238976	-0.122902	0.102418	0.136558	-0.061451	0.0751068	-0.0477952	0.22532	0.0136558	-0.232148	0.00682789	-0.184353	0.12973
g__Clostridium_sensu_stricto_1	0.443771	0.297874	0.431613	0.0790277	-0.419455	-0.0607906	-0.334348	0.0911858	0.00607906	-0.352585	0.352585	-0.109423	-0.12766	0.498483	0.121581	0.249241	0.370822
g__Bifidobacterium	0.10303	0.6	0.636364	0.333333	-0.539394	-0.272727	-0.672727	0.236364	0.442424	-0.806061	0.539394	0.151515	0.260606	0.684848	0.575758	0.733333	0.0545455
g__Colidextribacter	0.660606	0.0181818	0.115152	0.187879	-0.224242	-0.309091	-0.00606061	0.321212	0.151515	-0.030303	0.0424242	0.260606	0.2	0.406061	-0.10303	0.0545455	0.0909091
g__Akkermansia	-0.477952	-0.7101	-0.648649	-0.587198	0.573543	0.751068	0.648649	-0.559887	-0.559887	0.532575	-0.826174	-0.662305	-0.7101	-0.518919	-0.505264	-0.600854	0.102418
g__norank_f__Ruminococcaceae	0.248485	-0.224242	-0.478788	0.00606061	0.187879	0.00606061	0.551515	-0.00606061	-0.175758	0.466667	-0.284848	0.0181818	0.00606061	-0.2	-0.333333	-0.551515	0.0181818
g__Adlercreutzia	-0.83891	-0.559273	-0.674775	-0.64438	0.583589	0.504562	0.620064	-0.778119	-0.571431	0.547115	-0.401218	-0.638301	-0.680854	-0.723408	-0.443771	-0.571431	-0.510641
g__GCA-900066575	0.468087	-0.19453	0.0182372	-0.0121581	0.0486324	-0.0607906	0.0851068	0.164134	-0.176293	0.352585	-0.0607906	0.12766	-0.00607906	-0.121581	-0.310032	-0.243162	0.273557
g__Family_XIII_AD3011_group	0.243162	0.0668696	-0.279637	-0.0121581	0.0425534	-0.32219	0.303953	0.19453	0.139818	0.340427	0.109423	0.340427	0.279637	-0.212767	-0.0486324	-0.237083	-0.279637
g__Bacteroides	-0.231004	-0.437692	-0.632222	-0.395139	0.279637	0.145897	0.632222	-0.504562	-0.528878	0.504562	-0.279637	-0.291795	-0.32219	-0.559273	-0.57751	-0.64438	-0.273557
g__unclassified_f__Christensenellaceae	0.660606	0.030303	0.139394	0.224242	-0.260606	-0.030303	-0.030303	0.466667	0.0787879	0.0424242	-0.0909091	0.248485	0.10303	0.175758	0.115152	-0.127273	0.660606
g__norank_f__Desulfovibrionaceae	0.00606061	-0.515152	-0.212121	-0.0666667	0.0666667	0.29697	0.29697	-0.0787879	-0.345455	0.29697	-0.406061	-0.212121	-0.466667	-0.175758	-0.139394	-0.478788	0.212121
g__norank_f__norank_o__Clostridia_UCG-014	0.175758	-0.309091	-0.515152	-0.333333	0.175758	0.127273	0.527273	-0.2	-0.284848	0.345455	-0.430303	-0.115152	-0.0666667	-0.272727	-0.539394	-0.418182	0.115152
g__Intestinimonas	-0.2	-0.29697	-0.818182	-0.721212	0.466667	0.478788	0.830303	-0.624242	-0.478788	0.551515	-0.478788	-0.612121	-0.478788	-0.454545	-0.636364	-0.612121	-0.0666667
g__Eubacterium_nodatum_group	-0.0181818	-0.248485	-0.672727	-0.575758	0.321212	0.10303	0.636364	-0.248485	-0.175758	0.478788	-0.381818	-0.0787879	-0.030303	-0.490909	-0.490909	-0.393939	-0.175758
g__NK4A214_group	-0.393939	-0.757576	-0.672727	-0.624242	0.563636	0.648485	0.660606	-0.515152	-0.648485	0.672727	-0.781818	-0.50303	-0.6	-0.769697	-0.624242	-0.709091	0.163636
g__Eubacterium_brachy_group	0.539394	0.0666667	0.115152	0.515152	-0.260606	-0.139394	-0.0181818	0.393939	0.0181818	0.00606061	0.00606061	0.272727	0.212121	0.187879	0.10303	-0.224242	0.515152
g__Streptococcus	0.321212	0.0424242	-0.0545455	0.406061	-0.127273	-0.115152	0.115152	0.321212	0.0545455	0.115152	-0.030303	0.260606	0.2	0.0181818	0.139394	-0.284848	0.284848
g__unclassified_f__Anaerovoracaceae	-0.492403	-0.814593	-0.790277	-0.541036	0.808514	0.851068	0.826752	-0.650459	-0.814593	0.8997	-0.863226	-0.735566	-0.77204	-0.826752	-0.729487	-0.954412	0.206688
g__Helicobacter	0.0181818	-0.236364	-0.321212	-0.127273	0.151515	0.236364	0.418182	-0.175758	-0.284848	0.369697	-0.187879	-0.29697	-0.406061	-0.139394	-0.163636	-0.490909	0.030303
g__Roseburia	0.407297	-0.200609	-0.279637	0.0486324	0.145897	0.145897	0.364743	0.170214	-0.206688	0.468087	-0.334348	0.0729487	0.0182372	-0.267478	-0.267478	-0.522799	0.522799
g__Alistipes	-0.151515	-0.515152	-0.345455	-0.369697	0.527273	0.442424	0.418182	-0.563636	-0.660606	0.551515	-0.381818	-0.587879	-0.539394	-0.345455	-0.769697	-0.50303	0.0424242
g__norank_f__Oscillospiraceae	-0.163636	-0.272727	-0.527273	-0.6	0.357576	0.381818	0.563636	-0.624242	-0.418182	0.309091	-0.333333	-0.648485	-0.515152	-0.115152	-0.6	-0.333333	-0.187879
g__norank_f__Erysipelotrichaceae	0.170735	-0.10366	-0.225614	-0.286591	0.00609767	-0.243907	0.280493	0.10366	0.121953	0.310981	0.0853674	0.176833	-0.0548791	-0.121953	-0.0121953	-0.140247	-0.469521
g__Butyricicoccus	-0.0851068	-0.668696	-0.662617	-0.656538	0.547115	0.468087	0.711249	-0.437692	-0.620064	0.802435	-0.620064	-0.413376	-0.51672	-0.699091	-0.759882	-0.729487	0.0972649
g__UBA1819	0.0136558	-0.0204837	-0.559887	-0.238976	0.136558	-0.122902	0.559887	-0.184353	-0.0955904	0.361878	-0.0341394	0	0.0477952	-0.300427	-0.266288	-0.409673	-0.361878
g__Erysipelatoclostridium	-0.298786	-0.68294	-0.658549	-0.121953	0.615865	0.536595	0.676842	-0.286591	-0.481716	0.68294	-0.810991	-0.323177	-0.34147	-0.573181	-0.487814	-0.774405	0.164637
g__Glutamicibacter	0.41761	0.342814	0.280484	0.29295	-0.186989	-0.511104	-0.311649	0.666929	0.666929	-0.186989	0.211921	0.723026	0.716793	0.261785	0.367746	0.473706	-0.0872617
g__Paludicola	-0.32005	-0.33735	-0.700649	-0.449799	0.493049	0.33735	0.700649	-0.397899	-0.397899	0.683349	-0.35465	-0.32005	-0.33735	-0.683349	-0.397899	-0.683349	-0.16435
g__norank_f__Peptococcaceae	0.212121	-0.212121	-0.0666667	-0.0545455	0.0909091	-0.0787879	0.139394	-0.187879	-0.357576	0.272727	0.030303	-0.0909091	-0.10303	-0.115152	-0.50303	-0.260606	-0.030303

## Sheet: SCFAs levels 
		AA μg/mg	PA μg/mg	BA μg/mg	IBA μg/mg	VA μg/mg
ND	2	0.8505	0.227038	0.6048
	3	1.1151		0.7776	0.050004	0.017388
	4	0.7938	0.359476	0.72576	0.033336	0.034776
	5	0.9072	0.397316			0.034776
	6	0.567	0.264877	0.38016		0.017388
	7		0.378396		0.066672	0.034776
	8		0.283797	0.19008	0.033336
	9	0.7182	0.302717	0.55296	0.033336	0.034776
	10	0.8505	0.491915	0.3456	0.033336	0.017388
	mean value	0.8289	0.338191	0.510994	0.04167	0.027324
	standard deviation	0.168845	0.0854763	0.214174	0.0139454	0.00929428
HFD	18	0.6975	0.180189	0.288	0.0992143	0.0414
	21	0.6993	0.189198	0.24192	0.066672	0.034776
	34	0.7425	0.225236	0.349714	0.0793714	0.0414
	36	0.7182	0.170278	0.20736	0.066672	0.017388
	59	0.593372	0.153998	0.20093	0.0775256	0.0202186
	mean value	0.690174	0.18378	0.257585	0.0778911	0.0310365
	standard deviation	0.0570768	0.0265992	0.0620294	0.0133111	0.0115336
SIM	12	0.4914	0.170278		0.050004	0.017388
	19
	20
	25	0.4725	0.151358		0.050004	0.017388
	37	0.4914	0.208118	0.22464
	57	0.5481	0.189198	0.29376	0.050004	0.017388
	45	0.679219	0.206935	0.135	0.0520875	0.0271687
	67	0.756	0.245957	0.38016	0.066672	0.069552
	73		0.132439
	mean value	0.573103	0.186326	0.25839	0.0537543	0.0297769
	standard deviation	0.11731	0.0384012	0.103992	0.00727735	0.0226347
GTP40-L	15	0.4725	0.113519	0.1728	0.066672	0.017388
	24
	27	0.4725	0.189198	0.13824	0.050004	0.017388
	28	0.42525		0.0648	0.04167
	47	0.5175	0.157665	0.144	0.0595286	0.0207
	53	0.6426	0.151358	0.19008	0.08334	0.034776
	61	0.417558	0.131999		0.0387628
	63			0.12096
	mean value	0.491318	0.148748	0.13848	0.0566629	0.022563
	standard deviation	0.0825657	0.0284788	0.043833	0.0167905	0.00829034
GTP40-M	16	0.9261			0.066672	0.052164
	17	0.495	0.180189	0.0822857
	29	0.4536	0.151358	0.12096	0.033336
	44	0.5103	0.170278	0.1728
	46		0.227038	0.27648	0.066672
	40	0.5481	0.170278	0.20736	0.033336	0.034776
	39		0.202712		0.0793714	0.0414
	26	0.4725	0.132439	0.13824	0.050004
	56	0.5481	0.151358	0.13824	0.033336
	mean value	0.564814	0.173206	0.162338	0.0518182	0.04278
	standard deviation	0.163209	0.0303573	0.0638315	0.0192722	0.00877576
GTP40-H	11	0.4536	0.189198	0.1728	0.066672	0.017388
	13	0.8127	0.283797	0.29376	0.08334	0.017388
	32	0.4347	0.113519	0.0864	0.033336
	55	0.4725	0.151358	0.1728	0.050004	0.017388
	71	0.6525	0.157665	0.267429	0.0595286	0.0207
	mean value	0.5652	0.179107	0.198638	0.0585761	0.018216
	standard deviation	0.16352	0.0644076	0.083236	0.018643	0.001656

## Sheet: gut microbial and SCFAs levels 
name	AA	PA	BA	IVA	VA
g__Lactobacillus	-0.268176	-0.230234	0.0666232	-0.275831	-0.0666226
g__unclassified_f__Lachnospiraceae	-0.196343	-0.0681528	-0.246462	0.0137251	-0.14879
g__Faecalibaculum	-0.388333	-0.400616	-0.528631	0.202778	-0.0621811
g__Lachnospiraceae_NK4A136_group	-0.0465825	-0.182178	-0.260832	0.107145	-0.064846
g__Dubosiella	-0.168045	-0.147664	-0.318746	0.0695112	0.225184
g__norank_f__Lachnospiraceae	-0.0026121	0.0624734	0.0857828	-0.113786	-0.0550747
g__Desulfovibrio	0.0792339	0.162518	0.102765	-0.15629	-0.161227
g__norank_f__Muribaculaceae	0.286088	0.312653	0.180314	-0.294933	-0.0319858
g__Staphylococcus	0.194166	0.230671	-0.020466	-0.0703967	0.183878
g__Turicibacter	0.454567	0.507867	0.389387	-0.340604	0.18924
g__Enterorhabdus	0.0243796	-0.0458721	-0.0465927	0.314793	-0.032423
g__Lachnospiraceae_UCG-006	-0.584241	-0.469206	-0.628348	0.0872211	-0.42905
g__Monoglobus	-0.178929	-0.0624734	-0.309602	-0.23864	-0.00710641
g__Candidatus_Saccharimonas	0.34088	0.204458	0.431091	-0.0929768	-0.126139
g__Clostridium_sensu_stricto_1	-0.292603	-0.352311	-0.476211	0.116278	-0.186768
g__Coriobacteriaceae_UCG-002	-0.256726	-0.22427	-0.353239	0.3665	0.0981623
g__Romboutsia	-0.342621	-0.204895	-0.546484	0.123526	-0.12836
g__Lachnoclostridium	0.0674794	-0.321542	-0.0553016	0.00398472	-0.0612928
g__norank_f__norank_o__Clostridia_UCG-014	0.295168	0.31062	0.305683	-0.169572	-0.0426385
g__Blautia	-0.236882	-0.210184	-0.188589	0.521669	-0.121946
g__Anaerotruncus	0.334059	0.0590041	0.0104552	0.298541	0.179737
g__Aerococcus	0.306185	0.297206	0.194947	-0.0201537	0.0859805
g__Family_XIII_AD3011_group	-0.200305	0.0799659	-0.214286	0.315304	-0.175033
g__norank_f__Desulfovibrionaceae	-0.242319	-0.32714	-0.132738	0.222058	-0.517554
g__Corynebacterium	0.316202	0.275571	0.30146	0.00332204	0.148633
g__Eubacterium_xylanophilum_group	0.287429	0.457732	0.363458	-0.0357344	0.318399
g__Roseburia	0.233871	0.360457	0.47918	-0.203043	0.0771608
g__Bifidobacterium	-0.0885638	-0.133641	-0.44379	0.411423	0.231128
g__Colidextribacter	-0.0222029	-0.0581046	-0.00609624	-0.314793	-0.181658
g__Alistipes	0.35307	0.31193	0.0701068	-0.401571	-0.0812796
g__norank_f__Ruminococcaceae	-0.0505007	0.162955	-0.0461572	0.131053	0.032423
g__norank_f__Eubacterium_coprostanoligenes_group	0.0785234	0.284649	0.344608	0.0264696	0.0652587
g__Helicobacter	0.0235089	-0.0528621	0.101023	-0.175328	-0.428161
g__Acinetobacter	0.218511	0.363637	0.332751	-0.290378	0.061244
g__Alloprevotella	0.390837	0.545033	0.319927	-0.423975	0.0233742
g__GCA-900066575	0.0353018	0.0107151	-0.105711	0.0394474	0.0324583
g__Intestinimonas	-0.426829	-0.127624	-0.21455	-0.301863	-0.449232
g__Adlercreutzia	-0.569839	-0.333991	-0.546169	-0.0037732	-0.16009
g__NK4A214_group	-0.123067	0.0292899	0.0106754	-0.0533858	-0.231998
g__unclassified_f__Christensenellaceae	-0.440645	-0.298582	-0.233769	0.234366	-0.290886
g__Butyricicoccus	-0.528528	-0.25787	-0.141581	-0.145284	-0.100422
g__norank_f__Oscillospiraceae	-0.168517	-0.0530921	-0.0481272	-0.320397	-0.347623
g__Streptococcus	-0.175305	-0.129153	-0.344587	0.286139	-0.253276
g__norank_f__Erysipelotrichaceae	0.531505	0.522813	0.2751	0.112886	0.286536
g__Akkermansia	-0.444793	-0.42348	-0.250104	-0.130898	-0.457204
g__Bacteroides	-0.0594642	0.132897	-0.250327	0.0724363	-0.024222
g__Eubacterium_nodatum_group	-0.289514	-0.137607	-0.377235	0.120389	-0.0536018
g__Eubacterium_brachy_group	-0.165869	-0.246399	-0.139343	0.390503	-0.167445
g__unclassified_f__Ruminococcaceae	0.36211	0.232992	0.194941	-0.045229	0.194835
g__unclassified_f__Oscillospiraceae	0.120453	0.326779	0.269717	-0.491105	-0.0771104
