# Supplementary material for: Gougunao tea polysaccharides ameliorate high-fat diet-induced hyperlipidemia and modulate gut microbiota
Source: Royal Society of Chemistry journal article supplement (doi:10.1039/d2fo01828d), 2022-11-30
Supplement: d2fo01828d6.xlsx [file d2fo01828d6.xlsx]

## Sheet: Body weight
	Initial body weight	1 week	2 week	3 week	4 week	5 week	6 week	7 week	8 week	9 week	10 week	11 week	12 week	13 week	14 week	15 week
ND	20.46	20.96	20.69	21.48	23.83	22.15	22.21	21.28	22.25	22.43	22.66	24.13	23.78	23.69	24.81	25.6
	19.97	20.55	20.34	20.66	22.55	22.04	22.38	21.84	22.26	22.33	22.53	23.4	23.88	23.59	26.8	25.69
	20.81	21.22	19.75	21.25	22.54	24.5	22.35	21.49	23.07	23.12	23.27	25.35	26.44	25.1	24.88	26.57
	20.09	20.17	20.69	20.63	22.24	23.35	22.81	22.45	22.23	22.86	23.57	24.36	25.04	23.81	24.46	25.7
	20.99	20.67	22.37	20.29	21.68	23.18	24.23	22.3	23.11	22.45	23	24	23.71	26.16	25.11	25.29
	20.78	21.05	20.88	22.07	23.74	21.86	22.86	23.47					24.81	24.24	26.5	27.52
	20.05	21.22	19.84	20.54	22.21								26.45			25.25
mean value	20.5167	20.77	20.7867	21.0633	22.7633	22.8467	22.796	22.1383	22.584	22.638	23.006	24.248	24.61	24.4317	25.212	25.77
standard deviation	0.41837	0.389224	0.873373	0.633125	0.805913	1.02054	0.745028	0.792803	0.462255	0.337298	0.428404	0.710894	1.19077	1.01148	0.974878	0.832188
HFD	21.13	21.13	21.62	24.75	25.73	26.1	27.39	27.57	28.52	26.98	29.52	28.31	29.98	28.02	30.4	31.96
	21.82	21.9	22.85	24.39	25.87	25.75	26.28	25.99	26.35	27.23	28.95	28.11	30.15	28.15	31.91	30.32
	21.45	21.57	23.04	25.72	26.8	26.35	27.18	27.39	28.03	28.22	29.45	28.58	27.81	29.54	29.53	29.62
	21.83	21.82	21.71	25.7	24.32	26.98	27.62	27.64	26.31	28.53	27	29.84	29.74	29.45	29.34	31.09
	21.36	21.06	23.4	24.69	25.62	25.87	26.24	26.55	28.13	26.37	28.48	27.46	28.93	29.31	30.87	32.22
	21.8	22.78	22.67	24.86	26.03	25.75	26.63	26.84	27.12	28.39	26.85	29.41	28.69	27.76	29.67	29.39
	21.19	21.18	23.38	25.69	26.58	26.31	27.46	27.34	27.66		26.95				29.64	29.8
mean value	21.5114	21.6343	22.6671	25.1143	25.85	26.1586	26.9714	27.0457	27.4457	27.62	28.1714	28.6183	29.2167	28.705	30.1943	30.6286
standard deviation	0.304271	0.60723	0.733751	0.569118	0.803783	0.438727	0.578459	0.610433	0.876182	0.883765	1.20866	0.8736	0.901769	0.810993	0.930571	1.14392
SIM	20.74	21.85	23.58	25.04	25.24	25.73	25.96	26.4	26.22	25.68	28.58	25.98	26.68	27.02	27.43	27.88
	20.89	21.56	23	25.16	26.03	26.02	26.62	26.92	27.22	25.39	28.74	27.45	26.6	29.13	29.34	30.21
	21.41	21.44	23.05	25.05	26.47	26.35	26.65	27.31	26.65	25.46	27.37	25.91	27.88	29.75	29.56	29.71
	21.75	21.74	22.41	26.11	25.82	25.69	26.21	26.75	26.3	27.92	27.12	27.54	28.75	28.93	29.64	31.1
	20.77	22.65	22.6	25.19	26.15	26.7	27.59	26.96	27.77	25.43	28.19	27.98	28.44	28.33	27.92	30.35
	21.47	21.96	23.54	24.73	26.41	26.61	26.84	27.01	28.05	27.51	28.7	28.37	28.33	29.3	28.87	29.95
	20.35	22.93	23.51	26.29	27.07	27.05				26.24					29.62
	21.49	22.24
	21.41
mean value	21.1422	22.0463	23.0986	25.3671	26.17	26.3071	26.645	26.8917	27.035	26.2329	28.1167	27.205	27.78	28.7433	28.9114	29.8667
standard deviation	0.465397	0.524648	0.470936	0.590387	0.572276	0.515775	0.563941	0.302087	0.769071	1.05952	0.707069	1.03032	0.926434	0.964192	0.895962	1.08175
GTP40-L	20.93	20.83	23.22	24.04	24.47	25.42	25.92	25.93	27.59	27.32	27.27	25.95	28.38	28.32	28.12	28.65
	21.2	21.38	23.62	25.23	25.88	25.27	27.16	25.57	27.68	27.21	28.02	27.73	29.68	27.96	28.47	29.16
	21.46	21.59	24.14	25.52	26.63	27.06	27	27.25	26.16	28.07	28.9	27.65	28.46	29.31	29.75	28.64
	21.52	21.39	23.14	26.24	25.39	26.41	25.72	27	27.89	27.85	28.35	28.14	29.46	29.21	29.07	29.44
	20.38	21.17	22.59	24.92	25.92	25.8	27.28	27.24	26.46	29.15	29.37	25.92	27.49	28.43	30.02	29.99
	21.15	21.82	24.16	24.83	26.4	25.52	26.28	26.84	26.57	28.81	29.23	26.44	26.84	27.89	29.09	28.81
	21.06	20.84	24.69	25.37		26.1	27.3	28.04	26.7	27.59					28.63	28.6
mean value	21.1	21.2886	23.6514	25.1643	25.7817	25.94	26.6657	26.8386	27.0071	28	28.5233	26.9717	28.385	28.52	29.0214	29.0414
standard deviation	0.380219	0.369117	0.724717	0.678942	0.775201	0.634586	0.675151	0.840108	0.69214	0.737179	0.80154	0.983126	1.09785	0.609721	0.683726	0.522093
GTP40-M	20.52	21.68	23.38	25.39	25.64	25.53	26.15	26.34	28.08	26.51	26.46	27.13	29.67	27.72	27.61	26.61
	20.56	22.26	23.96	25.57	25.86	25.68	26.38	26.71	26.67	27.67	25.86	26.67	27.15	27.03	27.31	28.22
	21.7	22.49	22.3	25.44	26.65	26.82	26.78	26.68	26.6	26.65	26.5	26.98	29.69	27.65	27.55	27.36
	21.91	22.05	23.95	25.26	25.59	27.05	27.2	27.24	28.06	26.38	26.72	26.33	27.32	27.25	27.15	27.51
	21.75	22.41	22.61	24.87	25.98	25.09	27.37	27.33	28.24	27.67	27.75	25.95	29.06	28.84	29.26	28.8
	21.32	22.34	23.22	25.23	26.68	25.99	26.96	26.87	27.86	26.07	26.08	27.4	28.34	26.53	27.03	27.08
mean value	21.2933	22.205	23.2367	25.2933	26.0667	26.0267	26.8067	26.8617	27.585	26.825	26.5617	26.7433	28.5383	27.5033	27.6517	27.5967
standard deviation	0.614936	0.298044	0.681606	0.241551	0.48496	0.764478	0.47107	0.371667	0.746023	0.682048	0.659649	0.537091	1.12519	0.786223	0.818985	0.792532
GTP40-H	21.97	20.94	24.13	25.7	26.39	25.63	25.27	25.46	27.1	27.19	27.07	27.2	27.49	27.2	27.31	28.22
	21.83	21.85	22.46	24.88	26.73	26.45	26.28	25.82	27.49	26.66	26.5	26.93	27.85	28.2	28.81	29.22
	20.72	21.17	23.72	25.15	25.3	27.34	26.93	26.66	26.35	28.54	26.32	26.3	26.45	25.97	26.82	30.81
	20.4	21.5	22.66	27.05	26.14	25.55	25.86	25.59	26.88	26.4	26.74	26.59	25.96	26.49	28.73	26.48
	20.36	21.66	22.49	25.88	26.68	25.5	26.41	26.18	28.04	27.66	27.4	27.8	28.39	28.49	27.09	29.68
	20.3	22.14	24	25.37	26.86	26.46	26.75	26.96
mean value	20.93	21.5433	23.2433	25.6717	26.35	26.155	26.25	26.1117	27.172	27.29	26.806	26.964	27.228	27.1233	28.06	28.72
standard deviation	0.766603	0.440212	0.788332	0.766013	0.576472	0.728691	0.608506	0.601146	0.63653	0.851234	0.434948	0.57804	1.00236	1.11698	1.06066	0.707107

## Sheet: Food intake
	ND	HFD	SIM	GTP40-L	GTP40-M	GTP40-H
1	2.66143	2.20333	2.19667	2.19476	2.44048	2.53
2	2.9581	2.24857	2.28238	2.36952	2.66286	2.53381
3	2.87476	2.24667	2.42238	2.39714	2.77429	2.57905
4	2.87619	2.14048	2.36619	2.1981	2.94667	2.34143
5	3.40333	2.44667	2.49762	2.43905	2.63381	2.44476
6	2.52571	2.24224	2.27347	2.26673	2.25633	2.20612
7	2.79179	2.10418	2.18439	2.12505	2.17867	2.03673
8	2.9925	2.22043	2.32129	2.21421	2.16643	2.43114
9	2.42943	2.00029	1.88514	1.87686	1.76914	1.79629
10	2.47429	1.88143	1.79	1.82	1.79143	1.77571
11	2.60429	2.04857	1.85238	1.76714	1.82	1.59381
12	2.63714	2.17857	2.24857	2.03286	1.94429	2.13714
13	2.69286	2.13464	2.13964	2.17964	2.045	2.12179
14	2.37	1.68714	1.75286	1.64286	1.51571	1.75714
15	2.18556	1.74178	1.62714	1.9368	1.89571	1.71571

## Sheet: organ weight
	number	Brain		Spleen		Liver		Heart		Kidney
ND	2	0.452	mean value	0.0742	0.0763667		mean value	0.1148	mean value	0.3217	mean value
	3	0.451	0.446	0.0724			1.00918	0.1258	0.113857	0.3235	0.3252
	4	0.449		0.0831		1.0039		0.1164
	5	0.433						0.1206
	6	0.465	standard deviation	0.0699	standard deviation	0.9482	standard deviation		standard deviation	0.3226	standard deviation
	7	0.45	0.0106419	0.0871	0.00702102	0.9976	0.0611035	0.0967	0.0104804		0.015114
	8	0.438		0.0715		0.9576				0.3296
	9	0.431				1.0306		0.1025		0.3035
	10	0.445				1.1172		0.1202		0.3503
HFD	54	0.436	mean value		mean value	1.4206	mean value	0.1187	mean value		mean value
	21	0.448	0.451556		0.0886		1.23685	0.121	0.124225	0.2788	0.33586
	66	0.465		0.0855				0.1468
	34	0.448		0.0902		1.3036				0.3548
	59	0.478	standard deviation	0.1156	standard deviation	1.1458	standard deviation	0.1238	standard deviation	0.358	standard deviation
	36	0.458	0.0140099	0.0787	0.0140382	1.1507	0.116765	0.1135	0.0143461	0.3321	0.0335729
	18	0.437				1.1242		0.1039		0.3556
	22	0.439		0.0773				0.1229
	35	0.455		0.0843		1.2762		0.1432
SIM	20	0.428	mean value	0.0605	mean value	0.944	mean value	0.1065	mean value	0.3315	mean value
	57		0.45775	0.0731	0.0724286	1.1652	1.05585		0.114617		0.342783
	37	0.489		0.0619		1.0617		0.1105		0.3223
	73	0.477		0.0795		1.072				0.3377
	25	0.475	standard deviation	0.0652	standard deviation	0.8056	standard deviation	0.1247	standard deviation		standard deviation
	67	0.445	0.0263045		0.0100596		0.16771	0.122	0.0071163		0.0157572
	12	0.482		0.0811		1.2866		0.1115		0.363
	45	0.42						0.1125		0.3589
	19	0.446		0.0857						0.3433
GTP40-L	27	0.46	mean value	0.0823	mean value		mean value	0.1204	mean value	0.3517	mean value
	14	0.442	0.462375		0.0807429	1.011	0.990629		0.131517	0.328	0.337833
	60	0.462		0.0768		1.0615		0.1343
	47	0.463		0.0796		1.0558				0.3239
	61	0.462	standard deviation	0.0806	standard deviation	1.1052	standard deviation	0.1276	standard deviation	0.3205	standard deviation
	53	0.474	0.0105687	0.0838	0.00482765	0.9476	0.144799	0.1305	0.00709857		0.0151947
	63	0.459		0.0885		1.0705		0.1353		0.3515
	15							0.141
	24	0.477		0.0736		0.6828				0.3514
	28	0.448				0.95				0.3401
GTP40-M	29	0.458	mean value		mean value		mean value	0.1167	mean value	0.328	mean value
	26	0.482	0.461667	0.1033	0.09565		0.970233		0.1226		0.344667
	39	0.421				1.0279		0.1176		0.3241
	46	0.501						0.1354
	40	0.456	standard deviation	0.0963	standard deviation	1.0423	standard deviation	0.1349	standard deviation	0.3735	standard deviation
	16	0.447	0.0241661	0.0917	0.00984068	1.0292	0.0779547	0.1236	0.011018	0.332	0.019982
	17	0.449		0.1001		0.9509				0.3488
	56	0.455		0.078		0.9284		0.1074
	44	0.486		0.1045		0.8427				0.3616
GTP40-H	11	0.442	mean value		mean value	0.9933	mean value	0.1189	mean value	0.3482	mean value
	62	0.461	0.452714	0.0884	0.0871		0.97406		0.119333	0.3618	0.35388
	32	0.497		0.0959				0.1287
	72	0.434		0.074		0.9802		0.108		0.3514
	55	0.445	standard deviation	0.0999	standard deviation	1.0281	standard deviation	0.1325	standard deviation	0.3543	standard deviation
	71	0.464	0.0237888	0.0773	0.0112985	0.9239	0.0409279	0.1203	0.0102794		0.00503359
	13	0.426				0.9448		0.1076		0.3537
