# Supplementary material for: Gougunao tea polysaccharides ameliorate high-fat diet-induced hyperlipidemia and modulate gut microbiota
Source: Royal Society of Chemistry journal article supplement (doi:10.1039/d2fo01828d), 2022-11-30
Supplement: d2fo01828d7.pdf [file d2fo01828d7.pdf]

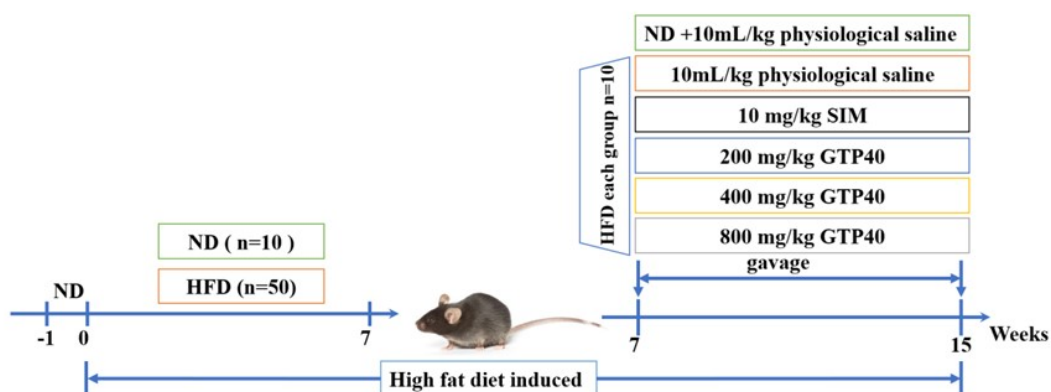

**Fig. S1** Animal experiment design

**Table S1** The compositions and energy ratio of high-fat diet and normal diet

| Component (g/1000 g)           | H10010 | H10060 |
|--------------------------------|--------|--------|
| casein                         | 189.58 | 258.45 |
| dicysteine                     | 2.84   | 3.88   |
| corn starch                    | 289.59 | 0      |
| maltodextrin                   | 33.18  | 161.53 |
| sucrose                        | 331.77 | 88.91  |
| fibrin                         | 47.40  | 64.61  |
| soybean oil                    | 23.70  | 32.31  |
| lard                           | 18.96  | 316.60 |
| M1002 Mineral mixture          | 9.48   | 12.92  |
| calcium hydrogen phosphate     | 12.32  | 16.8   |
| Calcarea carbonica             | 5.21   | 7.11   |
| Sodium-potassium               | 15.64  | 21.32  |
| V1001 Vitamin mixture          | 9.48   | 12.92  |
| choline bitartrate crystalline | 1.90   | 2.58   |
| edible grade blue dye          | 0      | 0.065  |
| edible grade yellow dye        | 0.047  | 0      |

**Table S2** Primer sequence

| Gene           | Forward 5'-3' Primer Sequence | Reverse 5'-3'Primer Sequence  |
|----------------|-------------------------------|-------------------------------|
| $\beta$ -actin | 5'-GCTCTGGCTCCTAGCACCAT-3'    | 5'-GCCACCGATCCACACAGAGT-3'    |
| TLR4           | 5'-TAGCCATTGCTGCCAACATC-3'    | 5'-CCTCAGCAGGGACTTCTCAA-3'    |
| TNF- $\alpha$  | 5'-CCAGCCGATGGGTTGTACCT-3'    | 5'-TGACGGCAGAGAGGAGGTTG-3'    |
| IL-10          | 5'-AGAGAAGCATGGCCAGAAA-3'     | 5'-ACACCTTGGTCTTGAGCTT-3'     |
| IL-6           | 5'-CTGCAAGAGACTTCCATCCAG-3'   | 5'-AGTGGTATAGACAGGTCTGTTGG-3' |
